# Supplementary material for: Evidence-based recommendations on storing and handling specimens for analyses of insect microbiota
Source: PubMed Central journal article supplement (PMC4548535; doi:10.7717/peerj.1190), 2015-08-18

### Butterfly

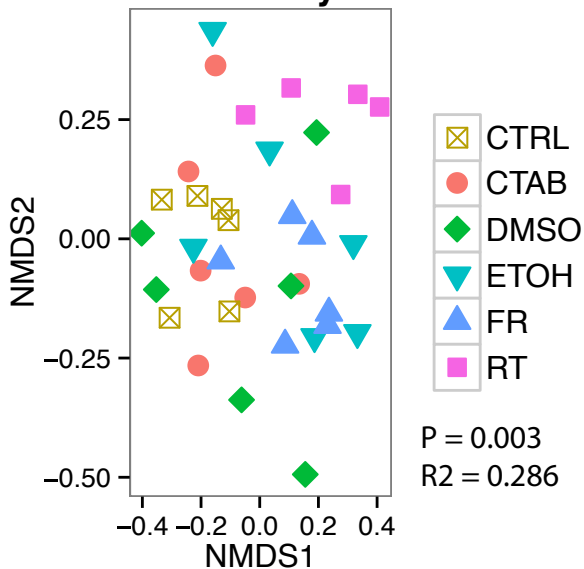

### Grasshopper

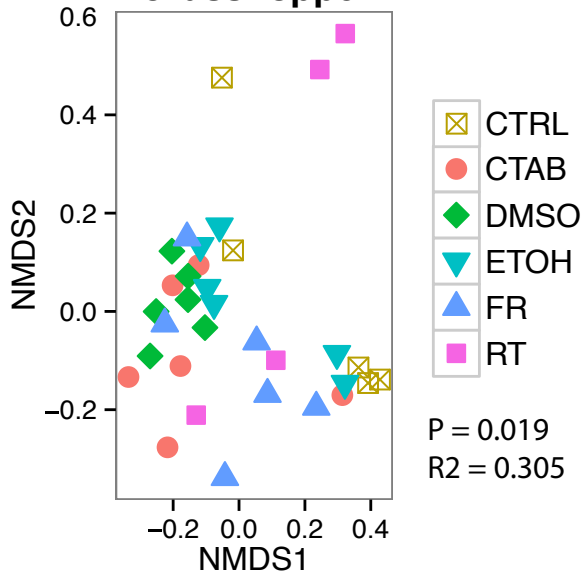

### Bee

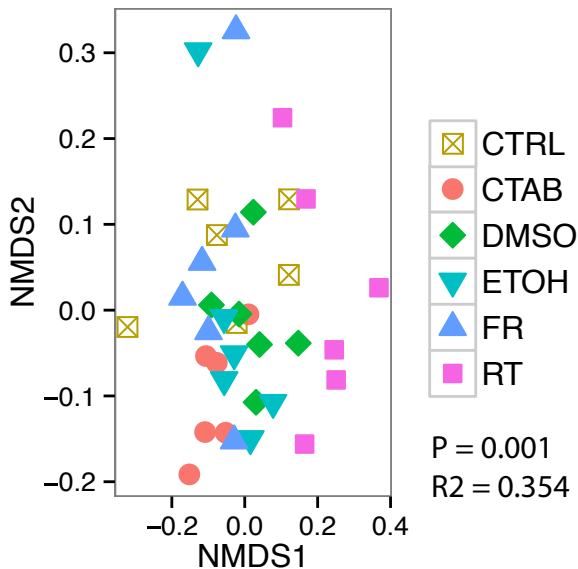

### Beetle

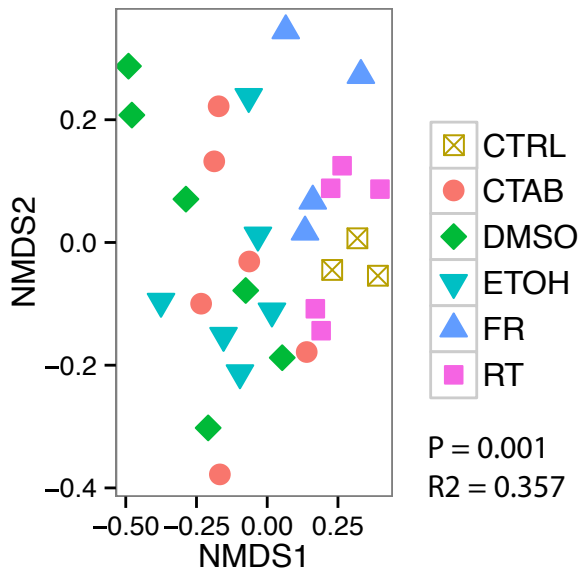

Supplement: peerj-03-1190-s001.pdf [file peerj-03-1190-s001.pdf]
