# Supplementary material for: Evidence-based recommendations on storing and handling specimens for analyses of insect microbiota
Source: PubMed Central journal article supplement (PMC4548535; doi:10.7717/peerj.1190), 2015-08-18

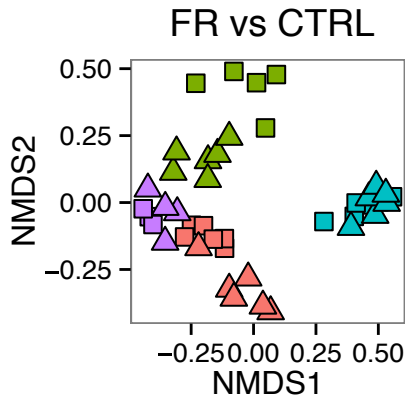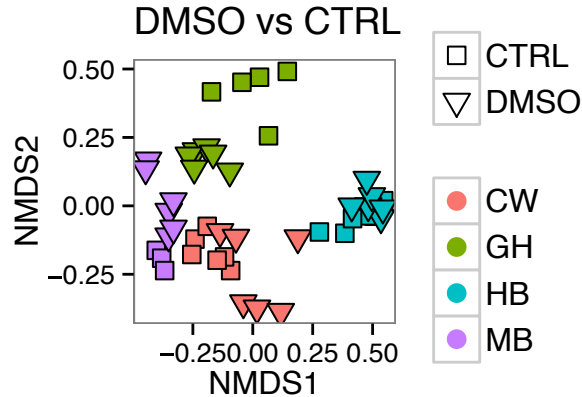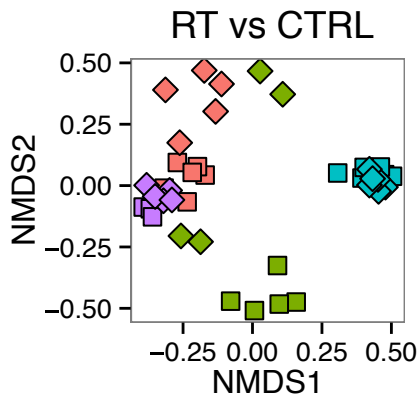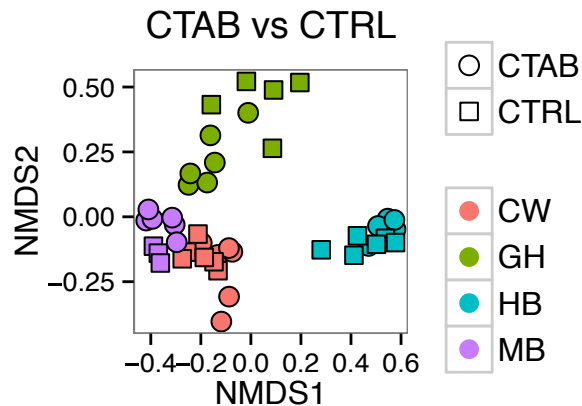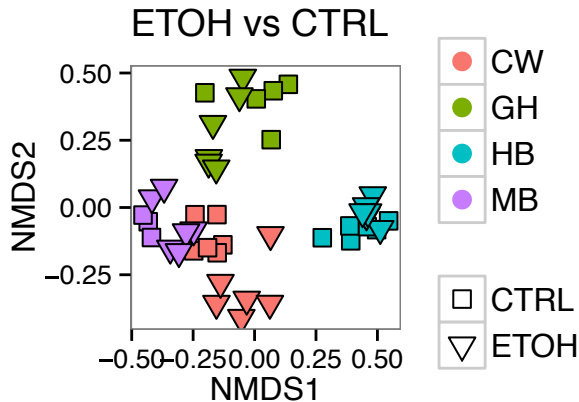

Supplement: peerj-03-1190-s002.pdf [file peerj-03-1190-s002.pdf]
