# Supplementary material for: Evidence-based recommendations on storing and handling specimens for analyses of insect microbiota
Source: PeerJ. 2015 Aug 18;3:e1190. doi: 10.7717/peerj.1190 (PMC4548535; doi:10.7717/peerj.1190)
Supplement: Table S1 — Dominant bacterial OTUs found in control specimens of each insect species tested. The five OTUs with the highest median relative abundance are listed, with the median number of reads contributed by each OTU (out of 2,000 per sample). The two OTUs that were abundant in multiple insect species are indicated by asterisks. Where bacteria could not be classified to genus level using the Greengenes taxonomy, the lowest-level classification is shown. Phylum and class-level classifications are indicated by cell color: Bacteroidetes (Saprospirae): pink; Firmicutes (Bacilli): orange; Proteobacteria (Alphaproteobacteria): purple; Proteobacteria (Betaproteobacteria): green; Proteobacteria (Gammaproteobacteria): blue; Tenericutes (Mollicutes): yellow. [file peerj-03-1190-s004.xlsx]

## Sheet: Sheet1
Speckle-winged grasshopper (Arphia conspersa)	Relative abundance (reads)
Entomoplasmatales	1691
Neisseriales; Neisseriaceae	3
Enterobacteriales; Enterobacteriaceae; Klebsiella*	1
Lactobacillales; Leuconostocaceae	1
Gammaproteobacteria	1
Cabbage white butterfly (Pieris rapae)	Relative abundance (reads)
Enterobacteriales; Enterobacteriaceae; Providencia	120.5
Pseudomonadales; Moraxellaceae; Acinetobacter	67.5
Enterobacteriales; Enterobacteriaceae; Yersinia	64
Enterobacteriales; Enterobacteriaceae; Klebsiella*	60.5
Pseudomonadales; Pseudomonadaceae**	32
Honey bee (Apis mellifera)	Relative abundance (reads)
Pasteurellales	546.5
Rhodospirillales; Acetobacteraceae	192.5
Lactobacillales; Lactobacillaceae; Lactobacillus	115
Pasteurellales	85.5
Neisseriales; Neisseriaceae; Kingella	81.5
Mexican bean beetle (Epilachna varivestis)	Relative abundance (reads)
Rhizobiales; Bradyrhizobiaceae; Bradyrhizobium	158
Bacillales; Alicyclobacillaceae; Alicyclobacillus	136
Pseudomonadales; Pseudomonadaceae**	135
Saprospirales; Chitinophagaceae; Sediminibacterium	73
Rhizobiales; Methylobacteriaceae; Methylobacterium	61
